# Supplementary material
Source: publisher figshare collection journal article supplement (https://aacr.figshare.com/articles/dataset/_/22787587)
Supplement: Supplementary file 1 [file 40496218]

**Table S3. Quality control of <sup>68</sup>Ga-N188 used in this study.**

| <b>Parameter</b>         | <b>QC Specification</b> | <b>QC Result</b> |
|--------------------------|-------------------------|------------------|
| <b>Appearance</b>        | Clear, colorless        | Pass             |
| <b>Volume</b>            | 2.0-10.0 mL             | 5.0 mL           |
| <b>pH</b>                | 5.0-8.0                 | 7.3              |
| <b>Radio-TLC</b>         | >95%                    | >99%             |
| <b>Radio-HPLC</b>        | >95%                    | >99%             |
| <b>Ethanol</b>           | <10%                    | 8%               |
| <b>Specific Activity</b> | 40-120 GBq/μmol         | 60 GBq/μmol      |
